# Supplementary material for: Poly(p-phenylene)s tethered with oligo(ethylene oxide): synthesis by Yamamoto polymerization and properties as solid polymer electrolytes
Source: Royal Society of Chemistry journal article supplement (doi:10.1039/d0py00115e), 2020-01-01
Supplement: d0py00115e1.pdf [file d0py00115e1.pdf]

## Electronic supplementary information

### Poly(*p*-phenylene)s tethered with oligo(ethylene oxide): synthesis by Yamamoto polymerization and properties as solid polymer electrolytes

Hannes Nederstedt and Patric Jannasch\*

*Polymer & Materials Chemistry, Department of Chemistry, Lund University, P.O. Box 124,*

*SE-221 00 Lund, Sweden. E-mail: patric.jannasch@chem.lu.se*

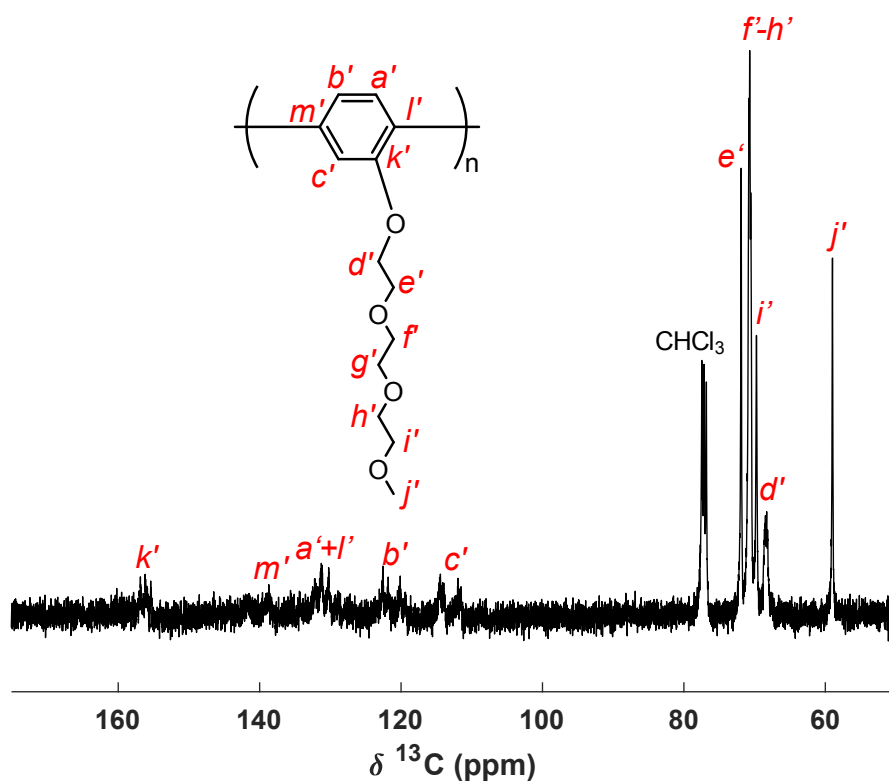

**Fig. S1.**  $^{13}\text{C}$  NMR spectrum of P(*p*P-EO<sub>3</sub>) recorded using a  $\text{CHCl}_3$  solution.

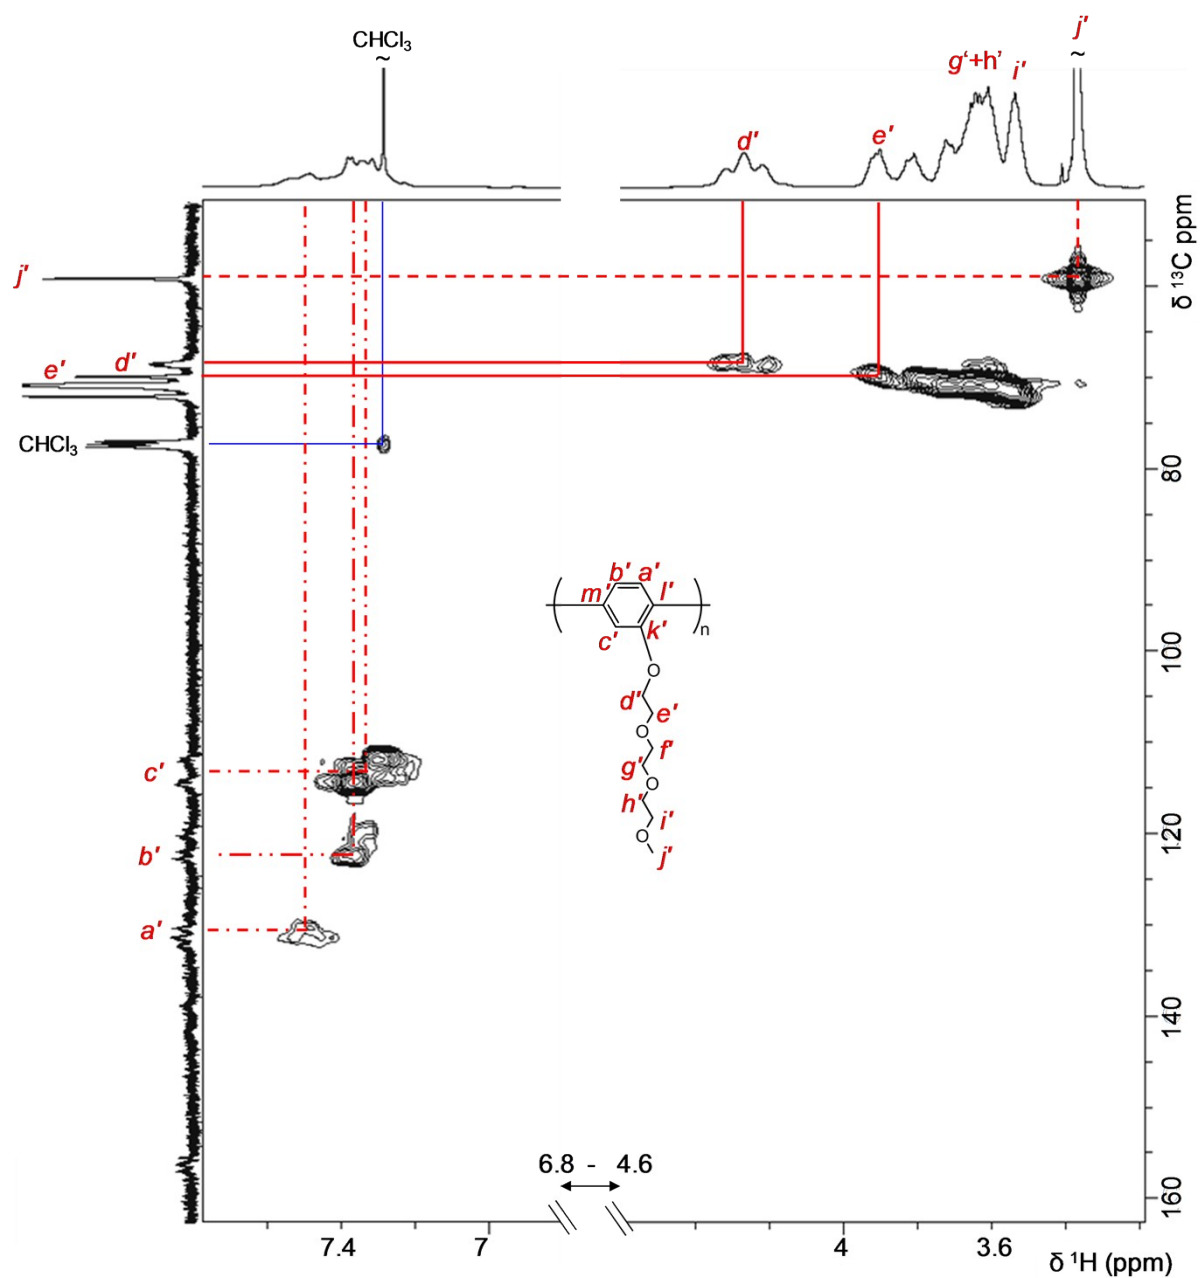

**Fig. S2.** HMQC NMR spectrum of P(*p*P-EO<sub>3</sub>) illustrating coupling between carbons and the protons that are directly attached to the corresponding carbon. Selected signals are marked in the figure. Note that the <sup>1</sup>H NMR spectrum has been cropped and the correlation signals at δ <sup>1</sup>H > 6.8 ppm have been more magnified compared to the signals at δ <sup>1</sup>H < 4.6 ppm, for clarity.

**Table S1.** Thermal properties of the polymer electrolyte membranes obtained by DSC.<sup>a</sup>

| Polymer                         | [EO]/[Li] | $T_{g,h}^b$<br>(°C) | $T_{ODT,1}^c$<br>(°C) | $T_{ODT,2}^d$<br>(°C) | $\Delta H_{ODT}^e$<br>(J g <sup>-1</sup> ) | $T_{g,c}^f$<br>(°C) | $T_{DOT,1}^g$<br>(°C) | $T_{DOT,2}^h$<br>(°C) | $\Delta H_{DOT}^i$<br>(J g <sup>-1</sup> ) |
|---------------------------------|-----------|---------------------|-----------------------|-----------------------|--------------------------------------------|---------------------|-----------------------|-----------------------|--------------------------------------------|
| P( <i>p</i> P-EO <sub>2</sub> ) | No salt   | -                   | 66                    | 172                   | 16                                         |                     | 70                    | 155                   | 14                                         |
| P( <i>p</i> P-EO <sub>3</sub> ) | No salt   | -48                 | 55                    | 168                   | 11                                         | -45                 | 70                    | 161                   | 11                                         |
|                                 | 40        | -35                 | 80                    | 197                   | 15                                         | -37                 | 68                    | 183                   | 15                                         |
|                                 | 30        | -31                 | 82                    | 197                   | 12                                         | -33                 | 87                    | 188                   | 8                                          |
|                                 | 20        | -21                 | 81                    | 197                   | 8                                          | -27                 | 76                    | 144                   | 3                                          |
|                                 | 10        | 15                  | -                     | -                     | -                                          | 13                  | -                     | -                     | -                                          |
| P( <i>p</i> P-EO <sub>4</sub> ) | No salt   | -54                 | 40                    | 161                   | 14                                         |                     | 54                    | 151                   | 10                                         |
|                                 | 40        | -42                 | 49                    | 197                   | 15                                         | -44                 | 74                    | 186                   | 8                                          |
|                                 | 30        | -38                 | 66                    | 197                   | 13                                         | -38                 | 80                    | 172                   | 4                                          |
|                                 | 20        | -30                 | 75                    | 197                   | 9                                          | -30                 | 87                    | 178                   | 3                                          |
|                                 | 10        | -11                 | 78                    | 197                   | 7                                          | -20                 | -                     | -                     | -                                          |

<sup>a</sup> Scan rate: 10 °C min<sup>-1</sup> under N<sub>2</sub>, <sup>b</sup>  $T_g$  obtained during the second heating cycle, <sup>c</sup> onset of ODT, <sup>d</sup> end of ODT, <sup>e</sup> Enthalpy of ODT, <sup>f</sup>  $T_g$  obtained during the cooling cycle, <sup>g</sup> End of DOT, <sup>h</sup> Onset of DOT, <sup>i</sup> Enthalpy of DOT.

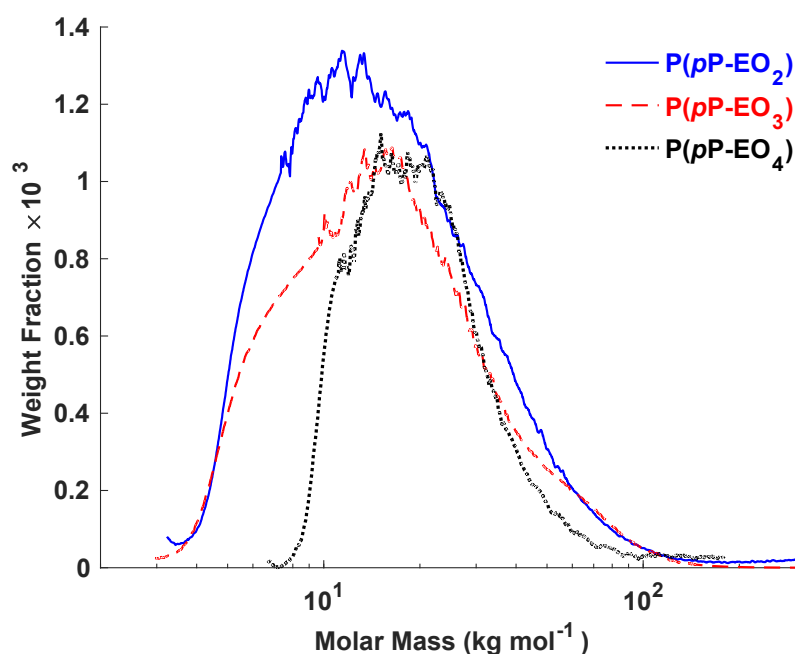**Fig. S3.** Molar mass distribution of the P(*p*P-EO<sub>x</sub>) samples, calculated from data obtained by SEC analysis using a triple detector setup.

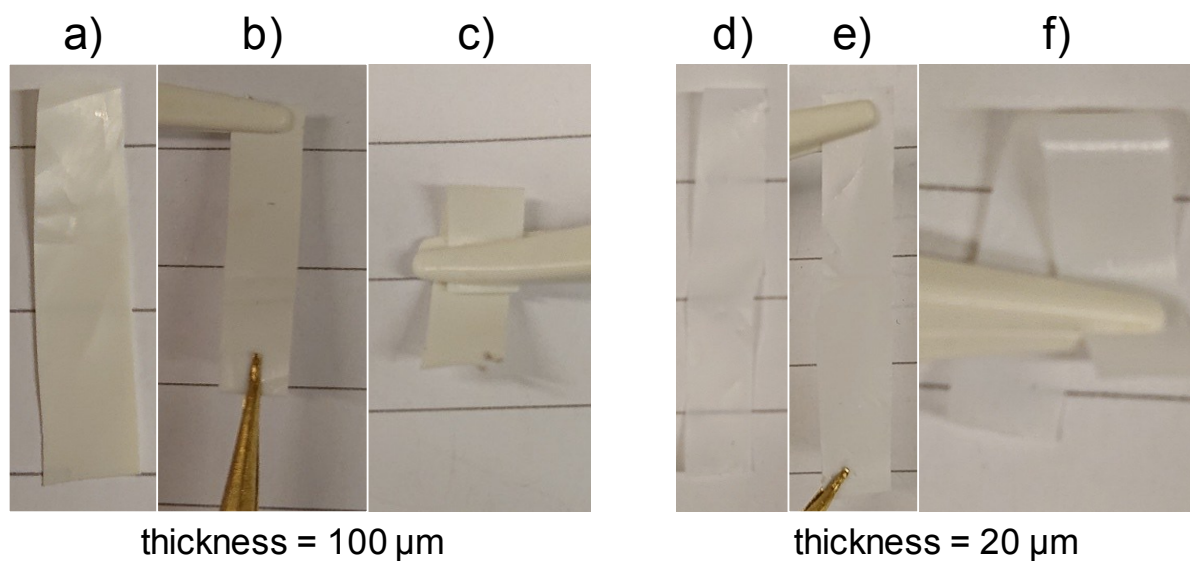

**Fig. S4.** Strips of films of  $P(pP-EO_2)$  cast from  $CHCl_3$  solutions of the polymer with thicknesses of 100 and 20  $\mu m$ . The 100  $\mu m$  thick films were opaque and white **(a)** and could be gently stretched **(b)** and folded **(c)**. The 20  $\mu m$  thick films were translucent **(d)** and still retained some strength **(e)** and flexibility **(f)**.

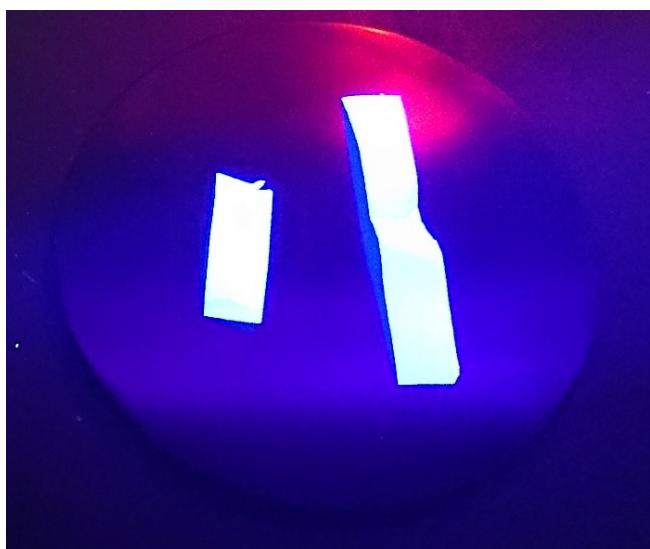

**Fig. S5.** Film strips of  $P(pP-EO_2)$  with the thicknesses 100 (left) and 20 (right)  $\mu m$  under UV irradiation. The conjugated structure the polymer gave rise to strong fluorescence.

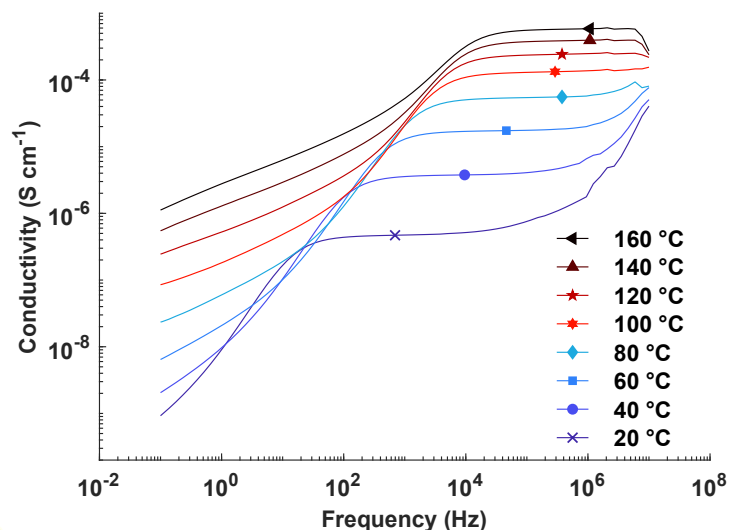

**Fig. S6.** Ionic conductivity of P(*p*P-EO<sub>3</sub>)-30 as a function of the ac frequency recorded during the second heating cycle in the EIS measurements. The dc conductivity values were obtained by extrapolation from the respective plateaus (marked by symbols).

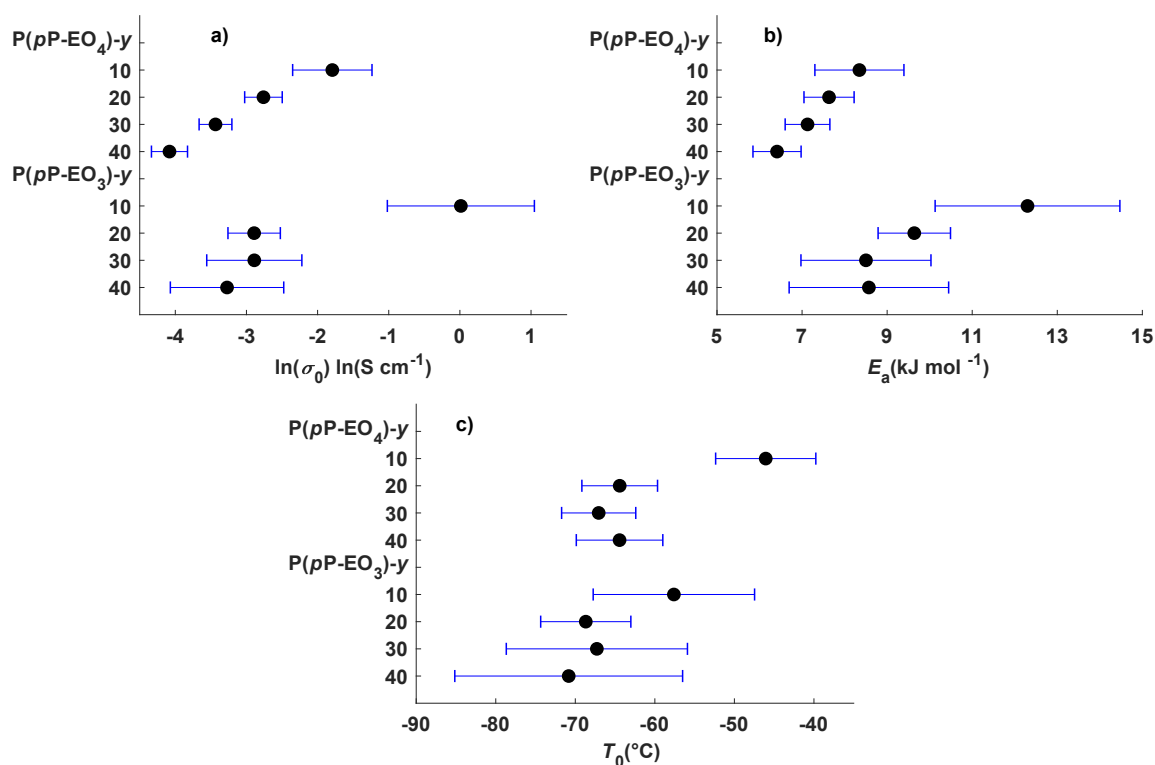

**Fig. S7.** Graphical representation of the parameters obtained by fitting EIS data to the VTF equation, (including estimations of the 95% confidence intervals).
